# Supplementary material for: Theoretical Encapsulation of Fluorouracil (5-FU) Anti-Cancer Chemotherapy Drug into Carbon Nanotubes (CNT) and Boron Nitride Nanotubes (BNNT)
Source: MDPI journal article supplement (doi:10.3390/molecules26164920), 2021-08-13
Supplement: s1 [file s1]

## **Supplementary information to:**

### **Theoretical encapsulation of Fluorouracil (5-FU) anti-cancer chemotherapy drug into carbon nanotubes (CNT) and boron nitride nanotubes (BNNT)**

Maryam Zarghami Dehaghani<sup>1</sup>, Farrokh Yousefi<sup>2</sup>, S. Mohammad Sajadi<sup>3,4</sup>, Muhammad Tajammal Munir<sup>3</sup>, Otman Abida<sup>5</sup>, Sajjad Habibzadeh<sup>6,\*</sup>, Amin Hamed Mashhadzadeh<sup>7,\*</sup>, Navid Rabiee<sup>8</sup>, Ebrahim Mostafavi<sup>9,10,\*</sup>, Mohammad Reza Saeb<sup>11</sup>

<sup>1</sup> Center of Excellence in Electrochemistry, School of Chemistry, College of Science, University of Tehran, Tehran, Iran

<sup>2</sup> Department of Physics, University of Zanjan, 45195-313, Zanjan, Iran

<sup>3</sup> Department of Nutrition, Cihan University-Erbil, Kurdistan Region, Iraq

<sup>4</sup> Department of Phytochemistry, SRC, Soran University, KRG, Iraq

<sup>5</sup> College of Engineering and Technology, American University of the Middle East, Kuwait

<sup>6</sup> Department of Chemical Engineering, Amirkabir University of Technology (Tehran Polytechnic), Tehran, Iran

<sup>7</sup> Mechanical and Aerospace Engineering, School of Engineering and Digital Sciences, Nazarbayev University, Nur-Sultan 010000, Kazakhstan

<sup>8</sup> Department of Chemistry, Sharif University of Technology, Tehran, Iran

<sup>9</sup> Stanford Cardiovascular Institute, Stanford University School of Medicine, Stanford, CA, USA

<sup>10</sup> Department of Medicine, Stanford University School of Medicine, Stanford, CA, USA

<sup>11</sup> Department of Polymer Technology, Faculty of Chemistry, Gdańsk University of Technology, G. Narutowicza 11/12 80-233, Gdańsk, Poland

\* Correspondence: Ebrahim Mostafavi, ebimsv@stanford.edu; Amin Hamed Mashhadzadeh, amin.hamed.m@gmail.com ; Sajjad Habibzadeh, sajjadhabibzadeh@gmail.com

## Details on Computations

The potential energy of the molecule 5-FU ( $E$ ) is defined as below [1]:

$$E = E_{val} + E_{nb} \quad (S1)$$

where  $E_{val}$  is valence or bonded interactions, and  $E_{nb}$  refers to non-bonded interactions which are the superposition of the van der Waals energy ( $E_{vdW}$ ) and Coulombic energy ( $E_Q$ ) (as shown in Eq. S2) [1]:

$$E_{nb} = E_{vdW} + E_Q \quad (S2)$$

$E_{vdW}$  depends on the two parameters of  $D_0$  and  $R_0$ , which are van der Waals well depth (kcal.mol<sup>-1</sup>), and van der Waals bond length (as defined in Eq. S3) [1]. The obtained values of the  $D_0$  and  $R_0$  for each atom type of the drug 5-FU are tabulated in Table S1.

$$E_{vdW} = D_0 \left( \left( \frac{R}{R_0} \right)^{-12} - 2 \left( \frac{R}{R_0} \right)^{-6} \right) \quad (S3)$$

**Table S1.** Van der Waals parameters of 5-FU atoms.

| Atom Type | $R_0$ (Å) | $D_0$ (Kcal.mol <sup>-1</sup> ) |
|-----------|-----------|---------------------------------|
| C_R       | 3.458     | 0.0950                          |
| N_R       | 3.293     | 0.1450                          |
| F_        | 2.928     | 0.3050                          |
| O_2       | 3.128     | 0.2150                          |
| H_A       | 2.852     | 0.0100                          |
| H_        | 2.852     | 0.0100                          |

The valence interaction comprises of the bonding stretch ( $E_B$ ), bond-angle bend ( $E_A$ ), dihedral angle torsion ( $E_T$ ), and inversion terms ( $E_I$ ) as represented in Eq. S4 [1]:

$$E_{val} = E_B + E_A + E_T + E_I \quad (S4)$$

The Bond stretch interaction is described as below [1]:

$$E_B = K_e (R - R_e)^2 \quad (S5)$$

The force constant ( $K_e$ ) and anharmonic terms near equilibrium ( $R_e$ ) for bond types of the drug 5-FU are reported in Table S2.

**Table S2.**  $K_e$  and  $R_e$  constants for bond types of drug 5-FU

| Bond Type | $K_e$ (Kcal.mol <sup>-1</sup> . Å <sup>-2</sup> ) | $R_e$ (Å) |
|-----------|---------------------------------------------------|-----------|
| C_R-N_R   | 350                                               | 1.340     |
| C_R-C_R   | 525                                               | 1.390     |
| C_R-O_2   | 700                                               | 0.970     |
| N_R-H_A   | 350                                               | 1.020     |
| C_R-H_    | 350                                               | 1.020     |
| C_R-F_    | 350                                               | 1.301     |

The bond-angle bend interaction energy ( $E_A$ ) between is defined in Eq. S6 [1]. The values of equilibrium angle ( $\theta_J^\circ$ ) and force constant ( $K_{IJK}$ ) for angle types of the drug 5-FU are summarized in Table S3.

$$E_A = E_{IJK} = K_{IJK}(\theta_{IJK} - \theta_J^\circ)^2 \quad (S6)$$

**Table S3.** Quantities of  $\theta_J^\circ$  and  $K_{IJK}$  for angle types of the drug 5-FU

| Angle Type  | $K_{IJK}$ (kcal.mol <sup>-1</sup> .rad <sup>-2</sup> ) | $\theta_J^\circ$ (rad) |
|-------------|--------------------------------------------------------|------------------------|
| C_R-C_R-N_R | 50                                                     | 120.00                 |
| N_R-C_R-O_2 | 50                                                     | 120.00                 |
| C_R-C_R-O_2 | 50                                                     | 120.00                 |
| C_R-N_R-C_R | 50                                                     | 120.00                 |
| C_R-N_R-H_A | 50                                                     | 120.00                 |
| N_R-C_R-N_R | 50                                                     | 120.00                 |
| N_R-C_R-H_  | 50                                                     | 120.00                 |
| C_R-C_R-H_  | 50                                                     | 120.00                 |
| C_R-C_R-C_R | 50                                                     | 120.00                 |
| C_R-C_R-F_  | 50                                                     | 120.00                 |

The torsion or dihedral interaction energy ( $E_D$ ) for two bonds  $IJ$  and  $KL$  connected with bond is defined as below [1]:

$$E_D = E_{IJKL} = V_{JK}(1 - \cos(n_{IL}(\varphi - \varphi_{JK}^\circ))) \quad (S7)$$

where  $V_{JK}$ ,  $n_{IL}$ , and  $\varphi_{JK}^\circ$  correspond to the barrier to rotation, the periodicity, and the equilibrium angle constants. The values of these constants for dihedral types of the drug 5-FU are summarized in Table S4.

**Table S4.** The values of  $V_{JK}$ ,  $n_{IL}$ , and  $\phi_{JK}^\circ$  for dihedral types of the drug 5-FU

| Dihedral Type   | $V_{JK}$ (Kcal.mol <sup>-1</sup> ) | $n_{IL}$ | $\phi_{JK}^\circ$ |
|-----------------|------------------------------------|----------|-------------------|
| C_R-C_R-N_R-C_R | 5                                  | 2        | 0                 |
| C_R-C_R-N_R-H_A | 5                                  | 2        | 0                 |
| O_2-C_R-N_R-C_R | 5                                  | 2        | 0                 |
| O_2-C_R-N_R-H_A | 5                                  | 2        | 0                 |
| C_R-C_R-C_R-N_R | 5                                  | 2        | 0                 |
| N_R-C_R-C_R-F   | 5                                  | 2        | 0                 |
| C_R-C_R-C_R-O_2 | 5                                  | 2        | 0                 |
| F-C_R-C_R-O_2   | 5                                  | 2        | 0                 |
| N_R-C_R-N_R-C_R | 5                                  | 2        | 0                 |
| N_R-C_R-N_R-H_A | 5                                  | 2        | 0                 |
| H-C_R-N_R-C_R   | 5                                  | 2        | 0                 |
| H-C_R-N_R-H_A   | 5                                  | 2        | 0                 |
| C_R-C_R-C_R-H   | 5                                  | 2        | 0                 |
| F-C_R-C_R-H     | 5                                  | 2        | 0                 |

The improper (inversion) interaction energy ( $E_I$ ) for drug 5-FU with planar equilibrium geometry is considered in Eq. S8 [1].

$$E_I = E_{IJKL} = K_I(1 - \cos\Psi_I) \quad (\text{S8})$$

where  $\Psi_I$  is an angle between the  $IL$  bond and  $JK$  plane. The values of force constant  $K_I$  for improper types of the drug 5-FU are listed in Table S5.

**Table S5.** values of  $K_I$  for improper types of the drug 5-FU

| Improper Type   | $K_I$ (kcal.mol <sup>-1</sup> .rad <sup>-2</sup> ) |
|-----------------|----------------------------------------------------|
| C_R-C_R-N_R-O_2 | 40.00                                              |
| C_R-N_R-C_R-H_A | 40.00                                              |
| N_R-C_R-N_R-O_2 | 40.00                                              |
| C_R-C_R-N_R-H   | 40.00                                              |
| C_R-C_R-C_R-F   | 40.00                                              |

The partial charges of atoms in drug 5-FU are reported in Table S6.

**Table S6.** Atomic charges of elements in drug 5-FU

| Atom | Charge    |
|------|-----------|
| C_R  | 0.495100  |
| N_R  | -0.494500 |
| C_R  | 0.590000  |
| N_R  | -0.526200 |
| C_R  | -0.001900 |
| C_R  | 0.487600  |
| F    | -0.550500 |
| O_2  | -0.390100 |

|     |           |
|-----|-----------|
| O_2 | -0.370200 |
| H_A | 0.289100  |
| H_A | 0.287200  |
| H   | 0.184300  |

---

## Reference

1. Mayo, S.L., B.D. Olafson, and W.A. Goddard, *DREIDING: a generic force field for molecular simulations*. Journal of Physical chemistry, 1990. **94**(26): p. 8897-8909.
